# Supplementary material for: Identification of a PRPF4 Loss-of-Function Variant That Abrogates U4/U6.U5 Tri-snRNP Integration and Is Associated with Retinitis Pigmentosa
Source: PubMed Central journal article supplement (PMC4226509; doi:10.1371/journal.pone.0111754), 2014-11-10
Supplement: pone.0111754.s001.pdf [file pone.0111754.s001.pdf]

**Antisense morpholino oligos:**

|                   |                                  |
|-------------------|----------------------------------|
| <i>prpf4</i> -MO: | 5' -TGGAGCTTCATCTTCATCTGACATC-3' |
| control-MO:       | 5' -CCTCTTACCTCAGTTACAATTTATA-3' |

**Oligos used for northern blot hybridization:**

|     |                                          |
|-----|------------------------------------------|
| U1: | 5' -ATCATGGTATCTCCCCTGCCAGGTAAGTAT-3'    |
| U4: | 5' -GGCGGGTATTGGGAAAAGTTTTCAATTAGC-3'    |
| U6: | 5' -GCTAATCTTCTCTGTATCGATCCAATTTTAGTA-3' |

**Oligos used for cloning of zebrafish *prpf4* and human *PRPF4*:**

|                   |                                          |
|-------------------|------------------------------------------|
| <i>prpf4</i> fw:  | 5' -AATAGAATTCATGTCAGATGAAGATGAAGCTCC-3' |
| <i>prpf4</i> rev: | 5' -AATACTCGAGTTCTGACATCCAGAGTTTAAAGG-3' |
| <i>PRPF4</i> fw:  | 5' -AATACGGATCCATGGCTTCCTCGCGAGCCTC-3'   |
| <i>PRPF4</i> rev: | 5' -AATAACTCGAGTTCAGCCATCCACAGCTTGAAG-3' |

**Oligos used for *prpf4* morpholino binding site mutagenesis**

|                                    |                                                            |
|------------------------------------|------------------------------------------------------------|
| HA <i>prpf4</i> M1-InsA-SubsS2 fw  | 5' -CTAGCTTGGGATCCGAATTCATGGCTAGTGATGAAGATGAAGCTCCAGTTG-3' |
| HA <i>prpf4</i> M1-InsA-SubsS2 rev | 5' -CAACTGGAGCTTCATCTTCATCACTAGCCATGAATTCGGATCCCAAGCTAG-3' |

**Accession numbers for the *PRPF4* alignment:**

|                          |            |
|--------------------------|------------|
| Homo sapiens             | GI48146327 |
| Rattus norvegicus        | GI34868449 |
| Mus musculus             | GI55925589 |
| Xenopus laevis           | GI51703478 |
| Danio rerio              | GI41054303 |
| Drosophila melanogaster  | GI7293972  |
| Caenorhabditis elegans   | GI17505895 |
| Saccharomyces cerevisiae | GI6325435  |
